# Supplementary material for: Multi-model simulations of aerosol and ozone radiative forcing due to anthropogenic emission changes during the period 1990–2015
Source: Copernicus journal article supplement (doi:10.5194/acp-17-2709-2017), 2017-02-22
Supplement: Supplementary file 1 [file acp-17-2709-2017-supplement.pdf]

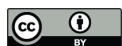

*Supplement of*

## **Multi-model simulations of aerosol and ozone radiative forcing due to anthropogenic emission changes during the period 1990–2015**

**Gunnar Myhre et al.**

*Correspondence to:* Gunnar Myhre ([gunnar.myhre@cicero.oslo.no](mailto:gunnar.myhre@cicero.oslo.no))

The copyright of individual parts of the supplement might differ from the CC-BY 3.0 licence.

## Supplementary material

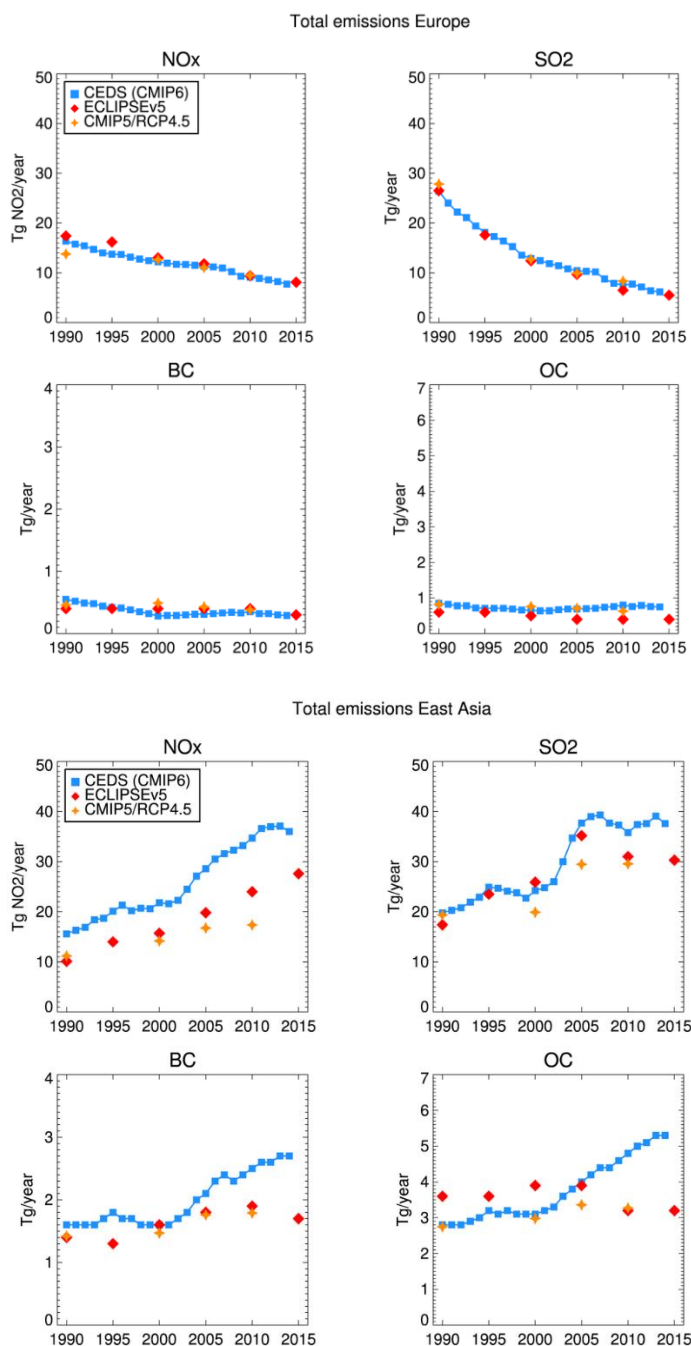

**Figure S1:** European and east Asian emissions of NO<sub>x</sub>, SO<sub>2</sub>, BC and OC for ECLIPSEv5 [Klimont *et al.*, 2016], data applied in Coupled Model Intercomparison Project (CMIP5) [Lamarque *et al.*, 2010], and Community Emissions Data System (CEDS) to be used in CMIP6 (Hoesly *et al.* in preparations) over the period 1990-2015. Emissions from agricultural waste burning and international aviation and shipping are excluded. The regions follow HTAP2 definitions ([www.htap.org/](http://www.htap.org/)).

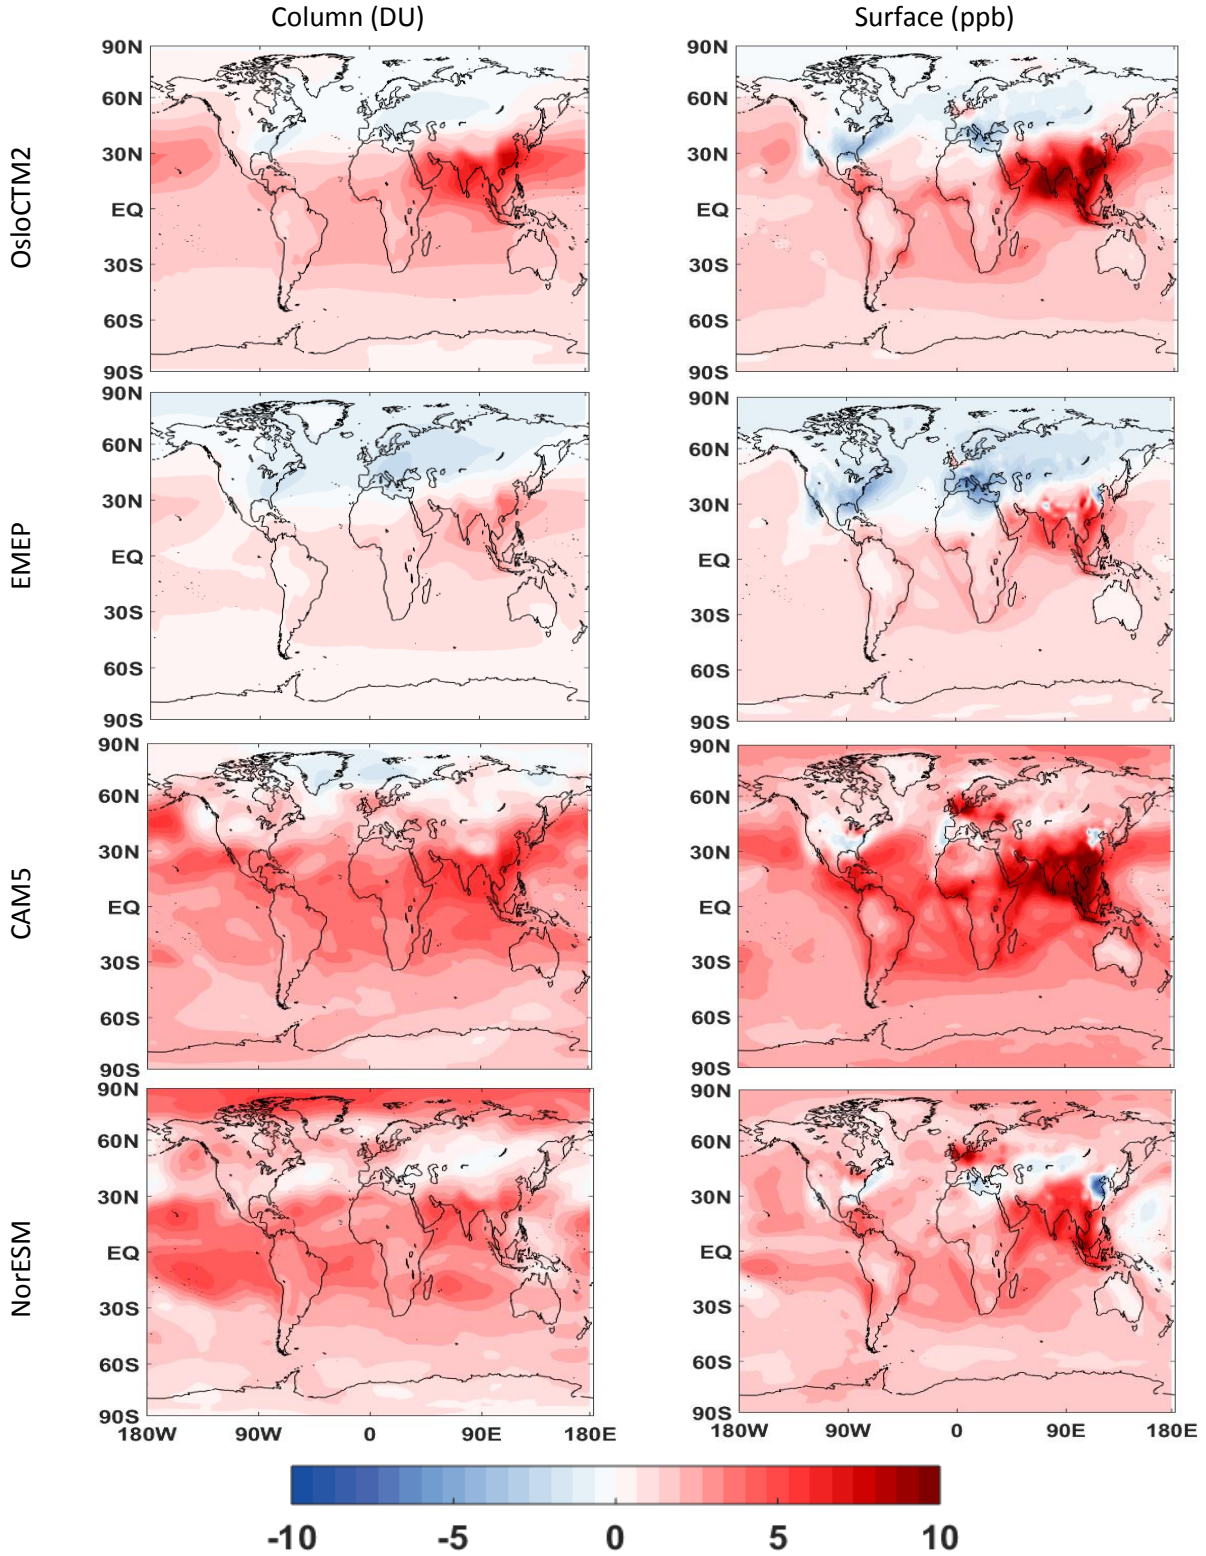

**Figure S2:** Tropospheric ozone column (Dobson units) and surface ozone changes (ppb) over the 1990-2015 period for four models. Tropopause assumed at ~100 hPa for 30S-30N and ~200 hPa elsewhere. CAM5 and NorESM are 3 year averages (1990:1992 vs. 2013:2015).

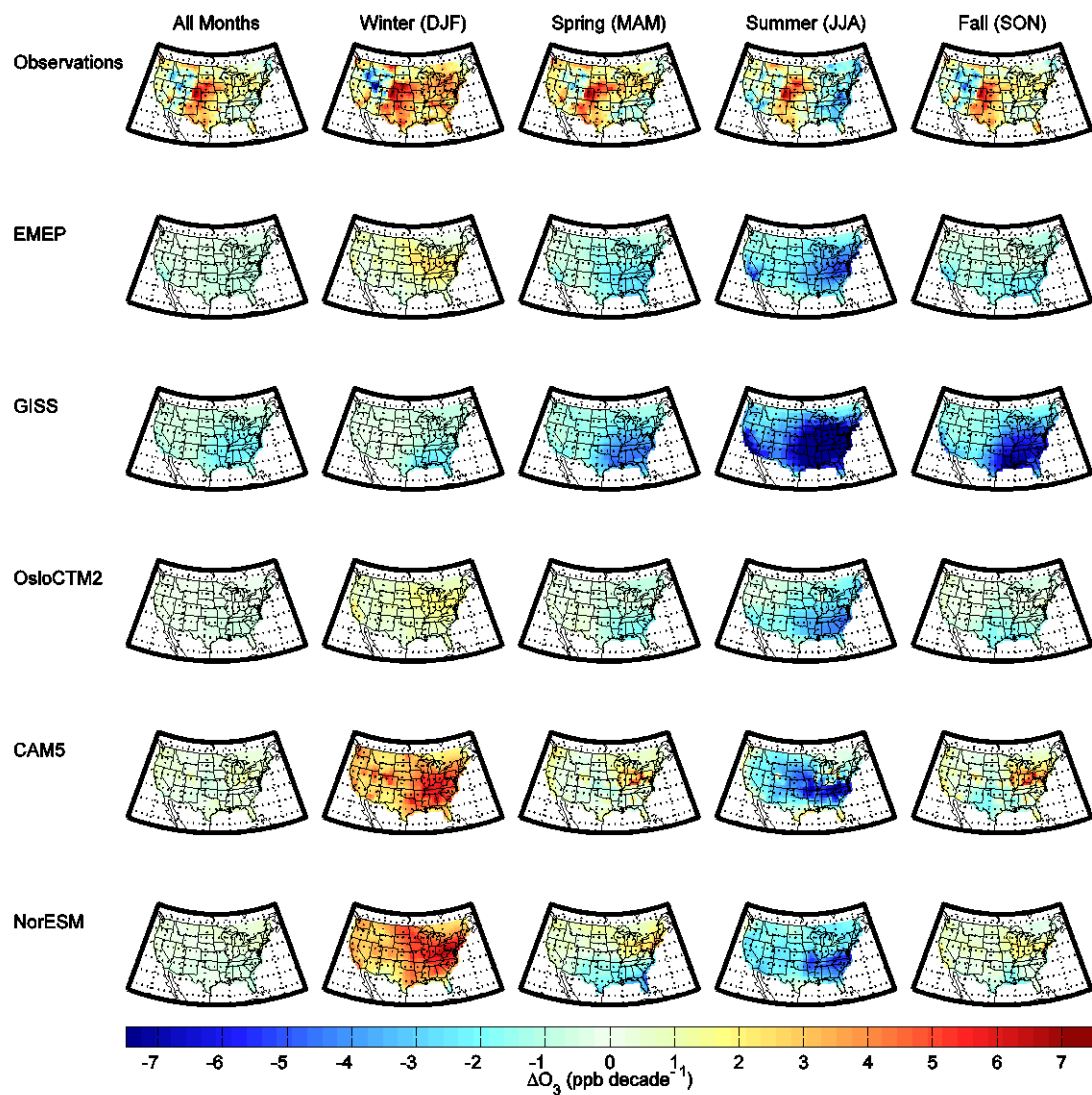

**Figure S3.** Surface ozone changes ( $\text{ppb decade}^{-1}$ ) in observations and five models over the US. Trends in the observations, CAM5, and NorESM are with respect to 1993-2013. Trends in EMEP, GISS-E2-R, and OsloCTM2 are derived from 5-year intervals from 1990-2015.

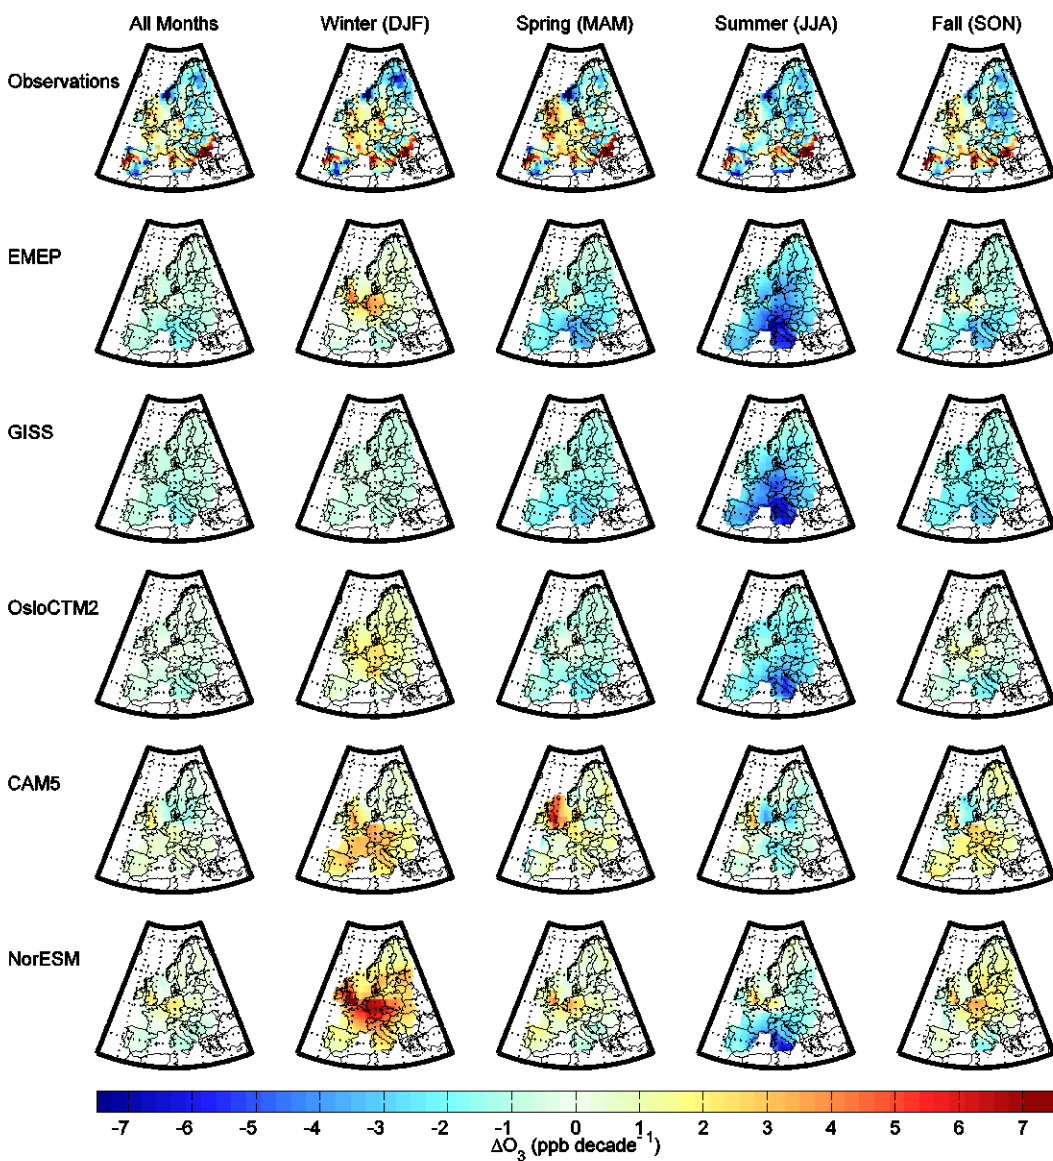

**Figure S4.** Surface ozone changes (ppb decade<sup>-1</sup>) in observations and five models over Europe. Trends in the observations, CAM5, and NorESM are with respect to 1997-2013. Trends in EMEP, GISS-E2-R, and OsloCTM2 are derived from 5-year intervals from 1995-2015.

**Table S1.** Surface ozone trends (ppb decade<sup>-1</sup>) for the observations (OBS), 5 global CCMs, and the model ensemble mean (EM) averaged over the US, Western US, Eastern US, Europe, Southern Europe, and Northern Europe with respect to the annual mean (ALL), winter (DJF), spring (MAM), summer (JJA), and fall (SON) months.

| <i>Region</i>       | <i>Months</i> | OBS <sup>a</sup> | EMEP <sup>b</sup> | GISS-E2-R <sup>b</sup> | OsloCTM2 <sup>b</sup> | CAM5 <sup>a</sup> | NorESM <sup>a</sup> | Model Mean <sup>c</sup> |
|---------------------|---------------|------------------|-------------------|------------------------|-----------------------|-------------------|---------------------|-------------------------|
| US <sup>d</sup>     | All           | 1.2              | -1.0              | -3.0                   | -0.5                  | 0.6               | 0.4                 | -0.7                    |
|                     | DJF           | 2.3              | 0.9               | -0.8                   | 0.9                   | 3.4               | 3.6                 | 1.6                     |
|                     | MAM           | 1.6              | -1.3              | -2.2                   | -0.5                  | 0.6               | 0.0                 | -0.7                    |
|                     | JJA           | 0.1              | -2.5              | -5.6                   | -1.9                  | -2.2              | -2.3                | -2.9                    |
|                     | SON           | 1.0              | -1.1              | -3.4                   | -0.5                  | 0.5               | 0.3                 | -0.8                    |
| Western US          | All           | 1.6              | -0.8              | -2.0                   | -0.2                  | 0.3               | 0.3                 | -0.5                    |
|                     | DJF           | 1.8              | 0.6               | -0.3                   | 0.7                   | 2.9               | 3.0                 | 1.4                     |
|                     | MAM           | 2.1              | -0.9              | -1.5                   | 0.0                   | 0.3               | -0.1                | -0.4                    |
|                     | JJA           | 1.2              | -1.8              | -4.1                   | -1.2                  | -2.0              | -1.8                | -2.2                    |
|                     | SON           | 1.1              | -1.0              | -2.2                   | -0.3                  | -0.1              | 0.3                 | -0.7                    |
| Eastern US          | All           | 0.9              | -1.3              | -4.0                   | -0.8                  | 0.9               | 0.4                 | -0.9                    |
|                     | DJF           | 2.8              | 1.2               | -1.2                   | 1.1                   | 4.0               | 4.2                 | 1.9                     |
|                     | MAM           | 1.0              | -1.8              | -3.0                   | -1.0                  | 0.9               | 0.0                 | -1.0                    |
|                     | JJA           | -1.2             | -3.2              | -7.1                   | -2.6                  | -2.3              | -2.9                | -3.7                    |
|                     | SON           | 0.9              | -1.2              | -4.6                   | -0.7                  | 1.1               | 0.2                 | -1.0                    |
| Europe <sup>e</sup> | All           | -0.1             | -1.3              | -1.7                   | -0.6                  | 0.7               | 0.8                 | -0.4                    |
|                     | DJF           | 0.1              | 0.7               | -0.6                   | 1.0                   | 1.6               | 2.8                 | 1.1                     |
|                     | MAM           | 0.5              | -1.6              | -1.5                   | -1.0                  | 1.0               | 0.5                 | -0.5                    |
|                     | JJA           | -0.8             | -3.1              | -3.0                   | -2.1                  | -0.6              | -1.1                | -2.0                    |
|                     | SON           | -0.1             | -1.3              | -1.8                   | -0.3                  | 0.8               | 0.8                 | -0.4                    |
| Southern Europe     | All           | 0.7              | -1.7              | -2.1                   | -0.8                  | 1.0               | 0.6                 | -0.6                    |
|                     | DJF           | 0.9              | 0.7               | -0.6                   | 1.0                   | 2.3               | 3.2                 | 1.3                     |
|                     | MAM           | 1.2              | -2.1              | -1.8                   | -1.2                  | 0.8               | 0.6                 | -0.7                    |
|                     | JJA           | 0.0              | -3.6              | -3.8                   | -2.5                  | -0.6              | -1.9                | -2.5                    |
|                     | SON           | 0.7              | -1.6              | -2.1                   | -0.5                  | 1.3               | 0.6                 | -0.5                    |
| Northern Europe     | All           | -1.1             | -0.9              | -1.3                   | -0.3                  | 0.3               | 0.9                 | -0.3                    |
|                     | DJF           | -1.0             | 0.7               | -0.7                   | 1.2                   | 0.6               | 2.4                 | 0.8                     |

|  |     |      |      |      |      |      |      |      |
|--|-----|------|------|------|------|------|------|------|
|  | MAM | -0.5 | -1.0 | -1.2 | -0.7 | 1.2  | 0.4  | -0.3 |
|  | JJA | -1.8 | -2.3 | -2.0 | -1.6 | -0.7 | -0.2 | -1.4 |
|  | SON | -1.0 | -0.9 | -1.5 | -0.1 | 0.1  | 1.1  | -0.3 |

<sup>a</sup>Trends calculated over 1993-2013 in US and 1997-2012 in Europe.

<sup>b</sup>Trends calculated using 5 year intervals from 1990 to 2015 in US and 1995 to 2015 in EU.

<sup>c</sup>The model mean is calculated by averaging each model's trend at each grid cell, then averaged over the region.

<sup>d</sup>The US domain is split into western and eastern regions at 96°W

<sup>e</sup>The Europe domain is split into southern and northern regions at 53°N

### Supplementary text for describing the radiative forcing calculations for greenhouse gases.

The WMO greenhouse gas concentrations and their associated radiative forcing for 2015 (<http://www.wmo.int/pages/prog/arep/gaw/ghg/GHGbulletin.html>) and the 1990 values in IPCC AR5 [Prather *et al.*, 2013] have been combined to derived the radiative forcing over the 1990-2015 period.

Klimont, Z., et al. (2016), Global anthropogenic emissions of particulate matter including black carbon, *Atmos. Chem. Phys. Discuss.*, 2016(doi: 10.5194/acp-2016-880), 1-72.

Lamarque, J., et al. (2010), Historical (1850-2000) gridded anthropogenic and biomass burning emissions of reactive gases and aerosols: methodology and application, *Atmos. Chem. Phys.*, 7017-7039.

Prather, M., et al. (2013), IPCC 2013: Annex II: Climate System Scenario Tables, in *Climate Change 2013: The Physical Science Basis. Contribution of Working Group I to the Fifth Assessment Report of the Intergovernmental Panel on Climate Change*, edited by T. F. Stocker, et al., pp. 1395-1445, Cambridge University Press, Cambridge, United Kingdom and New York, NY, USA.
